# Supplementary material for: Whole-genome landscape of mucosal melanoma reveals diverse drivers and therapeutic targets
Source: PubMed Central journal article supplement (PMC6639323; doi:10.1038/s41467-019-11107-x), 2019-07-18
Supplement: 41467_2019_11107_MOESM3_ESM.pdf [file 41467_2019_11107_MOESM3_ESM.pdf]

## **Description of Additional Supplementary Files**

File Name: Supplementary Data 1

Description: Clinico-pathological and sequencing information for 67 mucosal melanoma patients who underwent whole genome sequencing

File Name: Supplementary Data 2

Description: Clinico-pathological and sequencing information for 45 mucosal melanoma patients who underwent whole exome sequencing from FFPE

File Name: Supplementary Data 3

Description: SNV/indel coding mutations

File Name: Supplementary Data 4

Description: Significantly mutated genes

File Name: Supplementary Data 5

Description: Predicted in frame gene fusions

File Name: Supplementary Data 6

Description: Clinically actionable mutations
